# Supplementary material
Source: PubMed Central journal article supplement (PMC4248690)
Supplement: EC.00231-14_zek999094370so1.pdf [file EC.00231-14_zek999094370so1.pdf]

## Supplemental Information

Figure S1 (Huang et al)

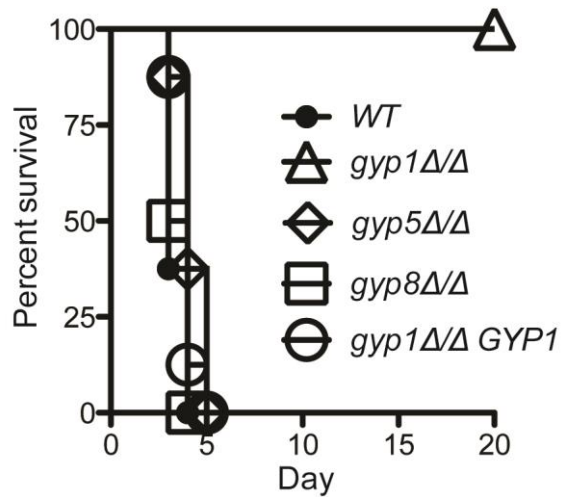

FIG S1. Requirement of Ypt1 GAPs for the virulence of *C. albicans*. Survival curve of mice injected with  $1 \times 10^6$  cells with indicated genotype (n = 8 per strain). Gyp1, but not Gyp5 or Gyp8, is required for the virulence. Strains used were HZX201, HZX250, and HZX251.

Figure S2 (Huang et al)

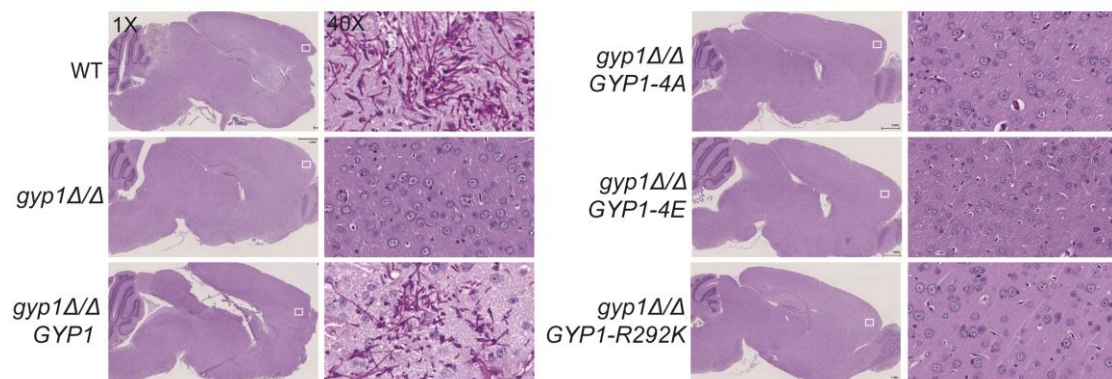

FIG S2. Histology analysis of the brains of infected mice. Necropsy and staining were performed as described in Figure 7C. *C. albicans* hyphae were only observed in the brain of the mice infected with WT (SC5314) or GYP1-reintegrant (HZX202) cells. Arrows indicate the region seen in the 40X images.

**Table S1: Plasmids used in this study.**

| Name       | Description                                                                                                                                                                                                                                                                                                                    |
|------------|--------------------------------------------------------------------------------------------------------------------------------------------------------------------------------------------------------------------------------------------------------------------------------------------------------------------------------|
| CIP10U     | Yeast integration vector (1)                                                                                                                                                                                                                                                                                                   |
| CIP10A     | <i>CaURA3</i> in CIP10U was replaced with <i>CaARG4</i>                                                                                                                                                                                                                                                                        |
| CIP10SAT   | <i>CaURA3</i> in CIP10U was replaced with <i>CaSAT1</i> (2)                                                                                                                                                                                                                                                                    |
| ZXP201     | <i>GYP1ΔURA3-FLP/pBKS</i> ; <i>GYP1</i> promoter region (-571 to -1 bp) and terminator region (1695 to 2117 bp) were cloned to flank the <i>CaURA3</i> flipper in pBKS vector. The knock-out cassette was released by <i>KpnI</i> and <i>SacII</i> for transformation                                                          |
| ZXP202     | <i>GYP1ΔHIS1/pBKS</i> ; <i>GYP1</i> promoter region (-571 to -1 bp) and terminator region (1695 to 2117 bp) were cloned to flank the <i>CaHIS1</i> in pBKS vector. The knock-out cassette was released by <i>KpnI</i> and <i>SacII</i> for transformation                                                                      |
| ZXP203     | <i>GYP5ΔURA3-FLP/pBKS</i> ; <i>GYP5</i> promoter region (-605 to -1 bp) and terminator region (1616 to 2149 bp) were cloned to flank the <i>CaURA3</i> flipper in pBKS vector. The knock-out cassette was released by <i>KpnI</i> and <i>SacII</i> for transformation                                                          |
| ZXP204     | <i>GYP8ΔURA3-FLP/pBKS</i> ; <i>GYP8</i> promoter region (-588 to -1 bp) and terminator region (2216 to 2715 bp) were cloned to flank the <i>CaURA3</i> flipper in pBKS vector. The knock-out cassette was released by <i>KpnI</i> and <i>SacII</i> for transformation                                                          |
| ZXP205     | Pro- <i>GYP1</i> -WT-GFP-UTR/CIP10A; DNA fragment containing <i>GYP1</i> promoter and coding region (-653 to 1692 bp) was cloned in frame with a C-terminal GFP epitope (followed by <i>UTR</i> ) into CIP10A. The plasmid was linearized by <i>PmeI</i> (generated by mutagenesis at promoter region -390 bp) for integration |
| ZXP206     | Pro- <i>GYP1</i> -R292K-GFP-UTR/CIP10A; ZXP205 was used as the template for mutagenesis to introduce the mutation R292K                                                                                                                                                                                                        |
| ZXP207     | Pro- <i>GYP1</i> -4A-GFP-UTR/CIP10A; ZXP205 was used as the template for mutagenesis to introduce the mutations: S32A, S96A, S105A and S167A                                                                                                                                                                                   |
| ZXP208     | Pro- <i>GYP1</i> -4E-GFP-UTR/CIP10A; ZXP205 was used as the template for mutagenesis to introduce the mutations: S32E, S96E, S105E and S167E                                                                                                                                                                                   |
| ZXP209     | Pro- <i>GYP1</i> -WT-HA-UTR/CIP10A; GFP epitope in ZXP205 was replaced with HA epitope.                                                                                                                                                                                                                                        |
| ZXP210     | Pro- <i>GYP1</i> -R292K-HA-UTR/CIP10A; GFP epitope in ZXP206 was replaced with HA epitope.                                                                                                                                                                                                                                     |
| ZXP211     | Pro- <i>GYP1</i> -4A-HA-UTR/CIP10A; GFP epitope in ZXP207 was replaced with HA epitope.                                                                                                                                                                                                                                        |
| ZXP212     | Pro- <i>GYP1</i> -4E-HA-UTR/CIP10A; GFP epitope in ZXP208 was replaced with HA epitope.                                                                                                                                                                                                                                        |
| ZXP213     | <i>GYP1c</i> -GFP-UTR/CIP10U; DNA fragment containing <i>GYP1</i> coding region (628 to 1692) was cloned in frame with a C-terminal GFP epitope (followed by <i>UTR</i> ) into CIP10U. The plasmid was linearized by <i>XcmI</i> for integration                                                                               |
| ZXP214     | <i>MYO2c</i> -GFP-UTR/CIP10U; DNA fragment containing <i>MYO2</i> coding region (4075 to 4683) was cloned in frame with a C-terminal GFP epitope (followed by <i>UTR</i> ) into CIP10U. The plasmid was linearized by <i>BamHI</i> for integration                                                                             |
| ZXP214A    | <i>MYO2c</i> -HA-UTR/CIP10U; DNA fragment containing <i>MYO2</i> coding region (4075 to 4683) was cloned in frame with a C-terminal HA epitope (followed by <i>UTR</i> ) into CIP10U. The plasmid was linearized by <i>BamHI</i> for integration                                                                               |
| ZXP216     | <i>SEC7c</i> -GFP-UTR/CIP10U; DNA fragment containing <i>SEC7</i> coding region (4584 to 5517) was cloned in frame with a C-terminal GFP epitope (followed by <i>UTR</i> ) into CIP10SAT. The plasmid was linearized by <i>AatII</i> (generated by mutagenesis) for integration                                                |
| ZXP216A    | <i>SEC7c</i> -HA-UTR/CIP10U; DNA fragment containing <i>SEC7</i> coding region (4584 to 5517) was cloned in frame with a C-terminal HA epitope (followed by <i>UTR</i> ) into CIP10U. The plasmid was linearized by <i>AatII</i> (generated by mutagenesis) for integration                                                    |
| CIP-V1-GFP | GFP-tagged <i>CaVRG4</i> (3)                                                                                                                                                                                                                                                                                                   |
| CIP-ER-GFP | HDEL-tagged <i>KAR2</i> -GFP fusion (3)                                                                                                                                                                                                                                                                                        |

**Table S2: Strains used in this study**

| Strain   | Parent   | Relevant genotype                            | Source           |
|----------|----------|----------------------------------------------|------------------|
| SC5314   |          | Wild type                                    | Clinical isolate |
| BWP17    | SC5314   | SC5314; <i>ura3/ura3 his1/his1 arg4/arg4</i> | (4)              |
| HZX201   | BWP17    | BWP17; <i>gyp1Δ::FRT/gyp1Δ-HIS1</i>          | This study       |
| HZX202   | HZX201   | HZX201; <i>GYP1-GFP-ARG4</i>                 | This study       |
| HZX203   | HZX201   | HZX201; <i>GYP1-R292K-GFP-ARG4</i>           | This study       |
| HZX204   | HZX201   | HZX201; <i>GYP1-4A-GFP-ARG4</i>              | This study       |
| HZX205   | HZX201   | HZX201; <i>GYP1-4E-GFP-ARG4</i>              | This study       |
| HZX206   | HZX201   | HZX201; <i>GYP1-HA-ARG4</i>                  | This study       |
| HZX207   | HZX201   | HZX201; <i>GYP1-R292K-HA-ARG4</i>            | This study       |
| HZX208   | HZX201   | HZX201; <i>GYP1-4A-HA-ARG4</i>               | This study       |
| HZX209   | HZX201   | HZX201; <i>GYP1-4E-HA-ARG4</i>               | This study       |
| HZX210   | BWP17    | BWP17; <i>VRG4-GFP-URA3</i>                  | This study       |
| HZX211   | HZX201   | HZX201; <i>VRG4-GFP-URA3</i>                 | This study       |
| HZX215   | HZX206   | HZX206; <i>SEC7-GFP-URA3</i>                 | This study       |
| HZX216   | HZX201   | HZX201; <i>SEC7-GFP-URA3</i>                 | This study       |
| HZX217   | HZX207   | HZX207; <i>SEC7-GFP-URA3</i>                 | This study       |
| HZX218   | HZX208   | HZX208; <i>SEC7-GFP-URA3</i>                 | This study       |
| HZX219   | HZX209   | HZX209; <i>SEC7-GFP-URA3</i>                 | This study       |
| WYL2     | BWP17    | BWP17; <i>bni1Δ-ARG4/bni1Δ-HIS1</i>          | (5)              |
| HZX225   | WYL2     | WYL2; <i>GYP1-GFP-URA3</i>                   | This study       |
| IIHH6-4a | CAI4     | CAI4; <i>tpk1Δ::hisG/tpk1Δ::hisG</i>         | (6)              |
| AS1      | CAI4     | CAI4; <i>tpk2Δ::hisG/tpk2Δ::hisG</i>         | (7)              |
| HZX226   | IIHH6-4a | IIHH6-4a; <i>GYP1-GFP-URA3</i>               | This study       |
| HZX227   | AS1      | AS1; <i>GYP1-GFP-URA3</i>                    | This study       |
| HZX228   | HZX202   | HZX202; <i>MYO2-HA-URA3</i>                  | This study       |
| HZX229   | HZX203   | HZX203; <i>MYO2-HA-URA3</i>                  | This study       |
| HZX230   | HZX204   | HZX204; <i>MYO2-HA-URA3</i>                  | This study       |
| HZX231   | HZX205   | HZX205; <i>MYO2-HA-URA3</i>                  | This study       |

|        |        |                                       |            |
|--------|--------|---------------------------------------|------------|
| HZX232 | BWP17  | BWP17; MYO2-HA-URA3                   | This study |
| HZX233 | HZX201 | HZX201; <i>GYP1-4A-R292K-GFP-ARG4</i> | This study |
| BC1    | CAI4   | CAI4; <i>cyr1Δ::hisG/cyr1Δ::hisG</i>  | (8)        |
| HZX234 | BC1    | BC1; GYP1-GFP-URA3                    | This study |
| HZX250 | BWP17  | BWP17; <i>gyp5Δ::FRT/gyp5Δ::FRT</i>   | This study |
| HZX251 | BWP17  | BWP17; <i>gyp8Δ::FRT/gyp8Δ::FRT</i>   | This study |

### SUPPORTING REFERENCE:

1. **Murad AM, Lee PR, Broadbent ID, Barelle CJ, Brown AJ.** 2000. Clp10, an efficient and convenient integrating vector for *Candida albicans*. *Yeast* **16**:325-327.
2. **Reuss O, Vik A, Kolter R, Morschhauser J.** 2004. The SAT1 flipper, an optimized tool for gene disruption in *Candida albicans*. *Gene* **341**:119-127.
3. **Rida PC, Nishikawa A, Won GY, Dean N.** 2006. Yeast-to-hyphal transition triggers formin-dependent Golgi localization to the growing tip in *Candida albicans*. *Mol Biol Cell* **17**:4364-4378.
4. **Wilson RB, Davis D, Mitchell AP.** 1999. Rapid hypothesis testing with *Candida albicans* through gene disruption with short homology regions. *J Bacteriol* **181**:1868-1874.
5. **Li CR, Wang YM, Wang Y.** 2008. The IQGAP Iqg1 is a regulatory target of CDK for cytokinesis in *Candida albicans*. *Embo J* **27**:2998-3010.
6. **Bockmuhl DP, Krishnamurthy S, Gerads M, Sonneborn A, Ernst JF.** 2001. Distinct and redundant roles of the two protein kinase A isoforms Tpk1p and Tpk2p in morphogenesis and growth of *Candida albicans*. *Mol Microbiol* **42**:1243-1257.
7. **Sonneborn A, Bockmuhl DP, Gerads M, Kurpanek K, Sanglard D, Ernst JF.** 2000. Protein kinase A encoded by TPK2 regulates dimorphism of *Candida albicans*. *Mol Microbiol* **35**:386-396.
8. **Bai C, Xu XL, Wang HS, Wang YM, Chan FY, Wang Y.** 2011. Characterization of a hyperactive Cyr1 mutant reveals new regulatory mechanisms for cellular cAMP levels in *Candida albicans*. *Mol Microbiol* **82**:879-893.
